# Supplementary material for: Discovery of bladder cancer biomarkers in paired pre- and postoperative urine samples
Source: PubMed Central journal article supplement — Transl Androl Urol. 2021 Aug;10(8):3402–14. doi: 10.21037/tau-21-562 (PMC8421825; doi:10.21037/tau-21-562), 2021-08
Supplement: tau-10-08-3402-dss.pdf [file tau-10-08-3402-dss.pdf]

## Data Sharing Statement

|                     |                                                                                                                                                     |                                                                                                                   |
|---------------------|-----------------------------------------------------------------------------------------------------------------------------------------------------|-------------------------------------------------------------------------------------------------------------------|
| <b>Article Info</b> | <a href="https://dx.doi.org/10.21037/tau-21-562">https://dx.doi.org/10.21037/tau-21-562</a>                                                         |                                                                                                                   |
| <b>Item</b>         | <b>Question</b>                                                                                                                                     | <b>Authors' Response<br/>(place “-” if not applicable)</b>                                                        |
| 1                   | Would you like to share data collected for your study to others?                                                                                    | Yes.                                                                                                              |
| 2                   | If not, would you like to share the reason for your decision?                                                                                       | -                                                                                                                 |
| 3                   | What data in particular will be shared?                                                                                                             | All mass spectrometry proteomics data generated in this study.                                                    |
| 4                   | Any other documents will be shared? Such as study protocol, statistical analysis plan, informed consent form, clinical study report, analytic code. | The study design and statistical analysis plans will also be shared if requested.                                 |
| 5                   | When will data availability begin?                                                                                                                  | From the publication date.                                                                                        |
| 6                   | When will data availability end?                                                                                                                    | Two years within the publication date, since the technique may be updated over time.                              |
| 7                   | To whom will you share the data?                                                                                                                    | Medical oncologists, urologists and proteomics researches who are interested in studies of bladder cancer.        |
| 8                   | For what type of analysis or purpose?                                                                                                               | For analysis of bladder cancer biomarkers from urine proteomics.                                                  |
| 9                   | How or where can the data/documents be obtained?                                                                                                    | Emails could be sent to the addresses below to obtain the shared data: mingqi2005bd@163.com or chenlj829@163.com. |
| 10                  | Any other restrictions?                                                                                                                             | We may balance the potential benefits and risks for each request and then provide the data that could be shared.  |
